# Supplementary material
Source: publisher site journal article supplement (https://www.dovepress.com/article/394467)
Supplement: Supplementary file 1 [file get_supplementary_file.php]

**Supplementary Table 1.** Most frequent concomitant drugs by ATC CLASS in SOF/VEL (a) and GLE/PIB (b) cohort.

| a) SOF/VEL | | | | | | | | |
| --- | --- | --- | --- | --- | --- | --- | --- | --- |
|  | <50 years | | | | ≥50 years | | | |
|  | Overall, n (%) | Male, n (%) | Female, n (%) | p-value | Overall, n (%) | Male, n (%) | Female, n (%) | p-value |
| N | 8 | 8 | 0 |  | 127 | 74 | 53 |  |
| Alimentary tract and metabolism (ATC code A) | 8 (100) | 8 (100) | 0 | / | 112 (88.2) | 63 (85.1) | 49 (92.5) | 0.326 |
| *Drugs for acid related disorders* | 8 (100) | 8 | 0 | / | 110 (86.6) | 61 (82.4) | 49 (92.5) | 0.170 |
| *Drugs used in diabetes* | 0 | 0 | 0 | / | 9 (7.1) | 7 (9.5) | NR | / |
| CV system (ATC code C) | 5 (62.5) | 5 (62.5) | 0 | / | 79 (62.2) | 44 (59.5) | 35 (66.0) | 0.570 |
| *Cardiac therapy* | 0 | 0 | 0 | / | 11 (8.7) | 9 (12.2) | NR | / |
| *Beta blocking agents* | NR | NR | 0 | / | 11 (8.7) | 6 (8.1) | 5 (9.4) | 0.954 |
| *Lipid modifying agents* | NR | NR | 0 | / | 65 (51.2) | 38 (51.4) | 27 (50.9) | 0.893 |
| b) GLE/PIB | | | | | | | | |
| N | 28 | 17 | 11 |  | 107 | 60 | 47 |  |
| Alimentary tract and metabolism (ATC code A) | 22 (78.6) | 14 (82.4) | 8 (72.7) | 0.893 | 90 (84.1) | 50 (83.3) | 40 (85.1) | 0.986 |
| *Drugs for acid related disorders* | 22 (78.6) | 14 (82.4) | 8 (72.7) | 0.893 | 90 (84.1) | 50 (83.3) | 40 (85.1) | 0.986 |
| *Antidiarrheals* | NR | 0 | NR | / | 11 (10.3) | 7 (11.7) | 4 (8.5) | 0.831 |
| *Drugs used in diabetes* | 0 | 0 | 0 | / | 5 (4.7) | NR | NR | / |
| Cardiovascular system (ATC code C) | 12 (42.9) | 6 (35.3) | 6 (54.5) | 0.539 | 69 (64.5) | 36 (60.0) | 33 (70.2) | 0.372 |
| *Cardiac therapy* | NR | NR | NR | / | 9 (8.4) | 5 (8.3) | 4 (8.5) | 0.750 |
| *Beta blocking agents* | NR | NR | NR | / | 9 (8.4) | 5 (8.3) | 4 (8.5) | 0.750 |
| *Calcium channel blockers* | NR | NR | NR | / | 6 (5.6) | NR | 5 (10.6) | / |
| *Agents acting on RAAS* | 5 (17.9) | NR | NR | / | 18 (16.8) | 6 (10.0) | 12 (25.5) | 0.061 |
| *Lipid modifying agents* | 8 (28.6) | 4 (23.5) | 4 (36.4) | 0.76 | 42 (39.3) | 27 (45.0) | 15 (31.9) | 0.24 |
| Nervous system (ATC code N) | 12 (42.9) | 8 (47.1) | 4 (36.4) | 0.867 | 5 (4.7) | NR | 4 (8.5) | / |
| *Psycholeptics* | 10 (35.7) | 7 (41.2) | NR | / | NR | 0 | NR | / |
